# Supplementary material
Source: publisher site journal article supplement (https://www.dovepress.com/article/438850)
Supplement: Supplementary file 1 [file get_supplementary_file.php]

**Patterns, Risk factors, and Outcomes of Recurrence After Hepatectomy for Hepatocellular Carcinoma With and Without Microvascular Invasion**

Yang Yu1*, Xiao-Hui Wang2*, Wen-Jie Hu1, De-Hua Chen1, Zi-Li Hu3, Shao-Qiang Li1†

1 Hepatic Pancreatobiliary Surgery Center, The First Affiliated Hospital, Sun Yat-sen University, Guangzhou 510080, China;

2Department of Liver Surgery, Sun Yat-Sen University Cancer Center, Guangzhou, Guangdong, 510060, P. R. China.

3Department of Hepatobiliary Surgery, Hunan Provincial People's Hospital (The First Affiliated Hospital of Hunan Normal University) Changsha, 410005, Hunan province, China.

†Correspondence

Shao-Qiang Li, Hepatic Pancreatobiliary Surgery Center, the First Affiliated Hospital, Sun Yat-sen University, Guangzhou 510080, China. E-mail: [lishaoq@mail.sysu.edu.cn](mailto:lishaoq@mail.sysu.edu.cn). Tel: +86-020-87755766-8214, Fax: +86-020-87755766-8661

*These authors contributed equally to this work

**Supplementary Figure 1**. Distribution of the propensity score after matching.

**Supplementary Figure 2**. Standardized differences in mean or proportion of variables before and after propensity score matching

**Supplementary Figure 3**. Tumor recurrence at different time points. **P*<0.001

**Supplementary Table 1**. Occurrence rates of extrahepatic organs metastasis

**Supplementary Table 2**. Univariate analysis of risk factors associated with early and late recurrence in the entire cohort.

**Supplementary Table 3**. Univariate analysis of risk factors associated with early and late recurrence in the MVI(+) group

**Supplementary Table 4**. Univariate analysis of risk factors associated with early and late recurrence in the MVI(-) group

**Supplementary Figure 1**. Distribution of the propensity score after matching.


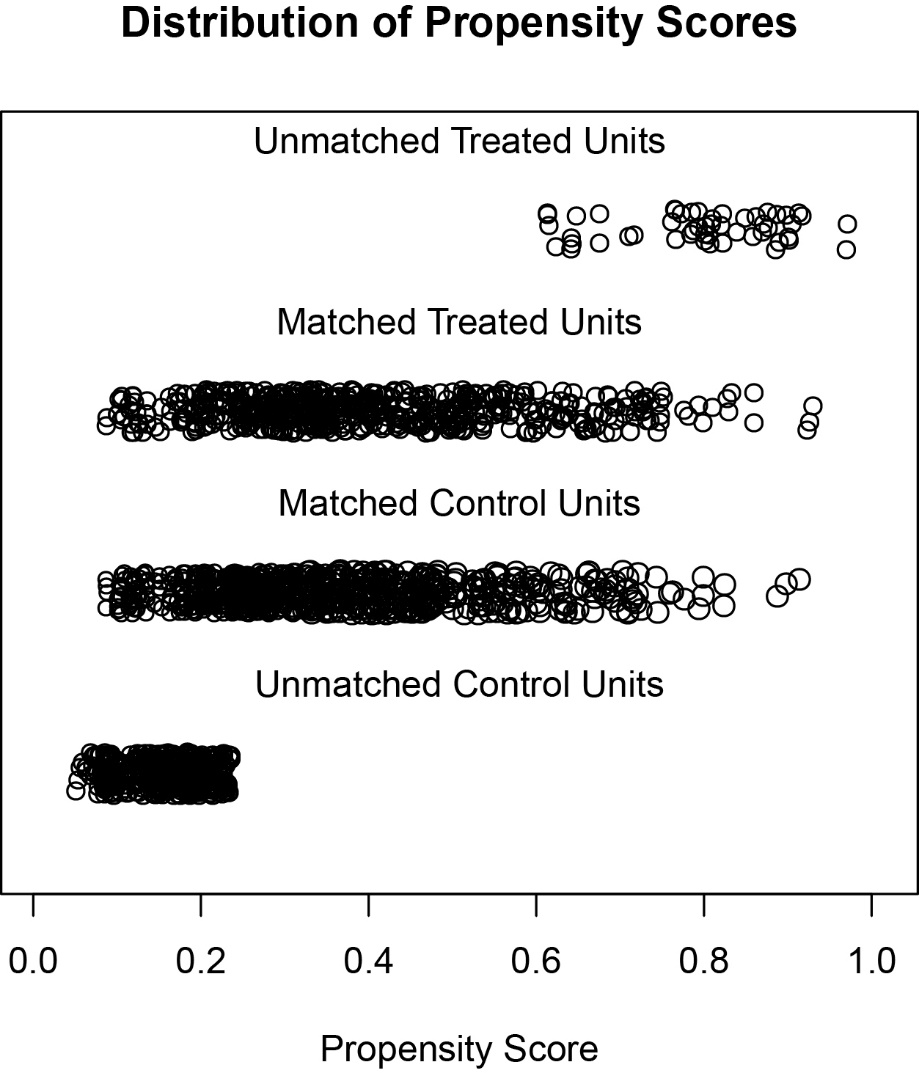


**Supplementary Figure 2**. Standardized differences in mean or proportion of variables before and after propensity score matching


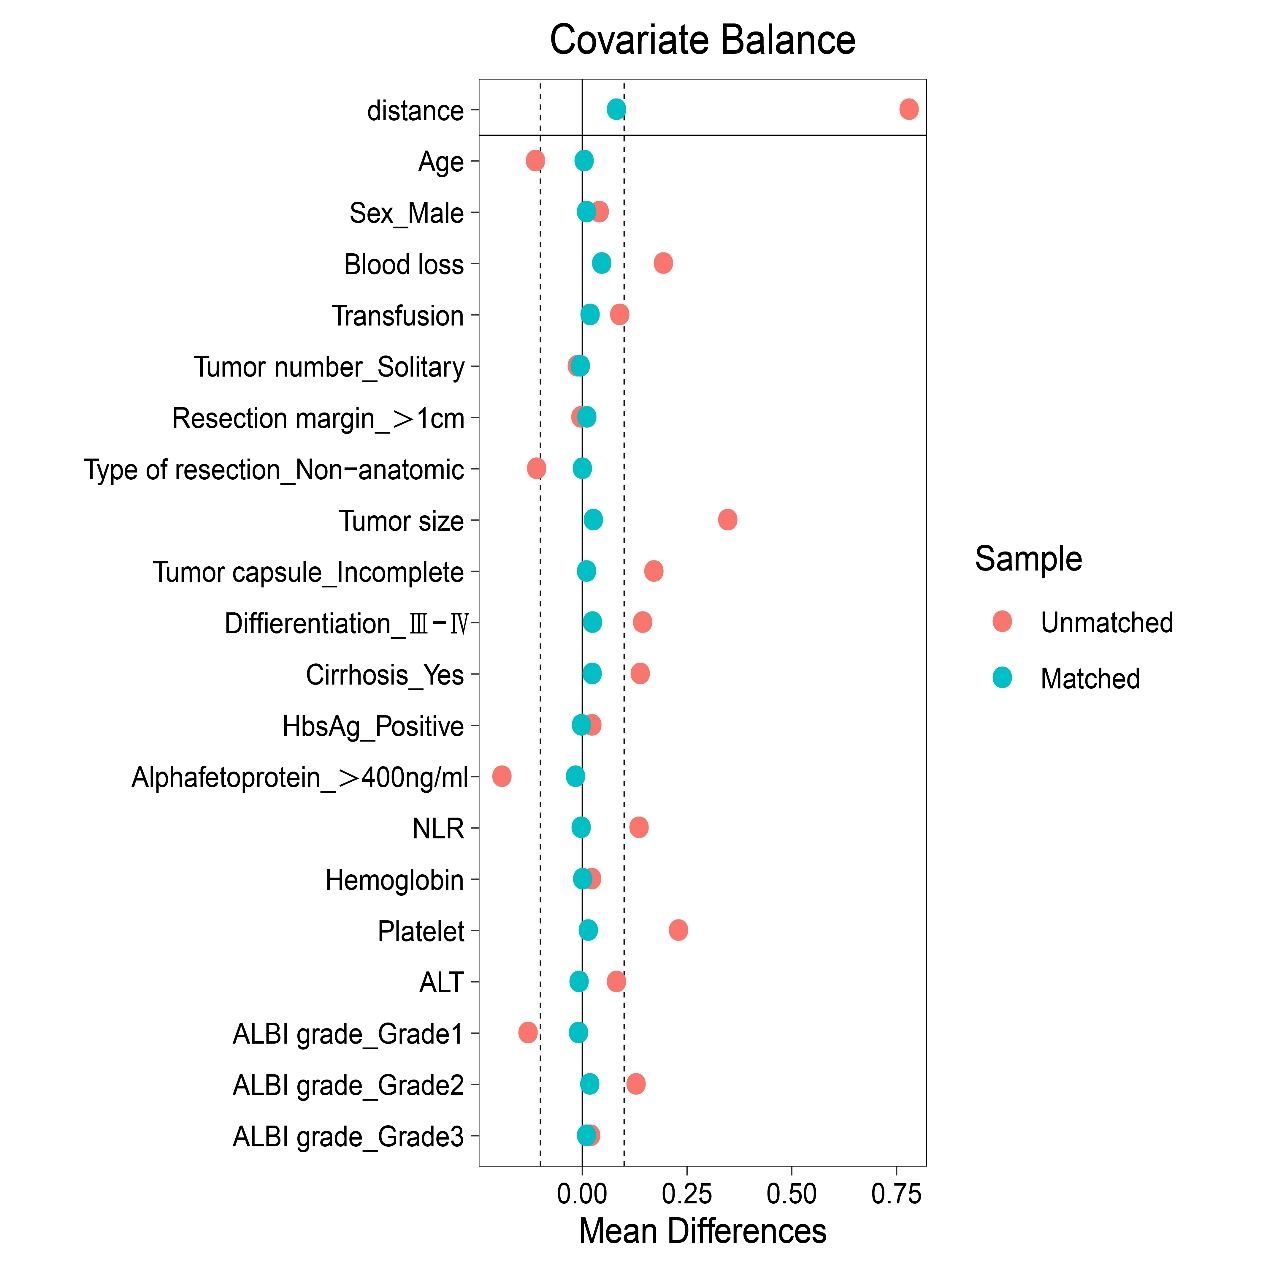


**Supplementary Figure 3**. Tumor recurrence at different time points. **P*<0.001


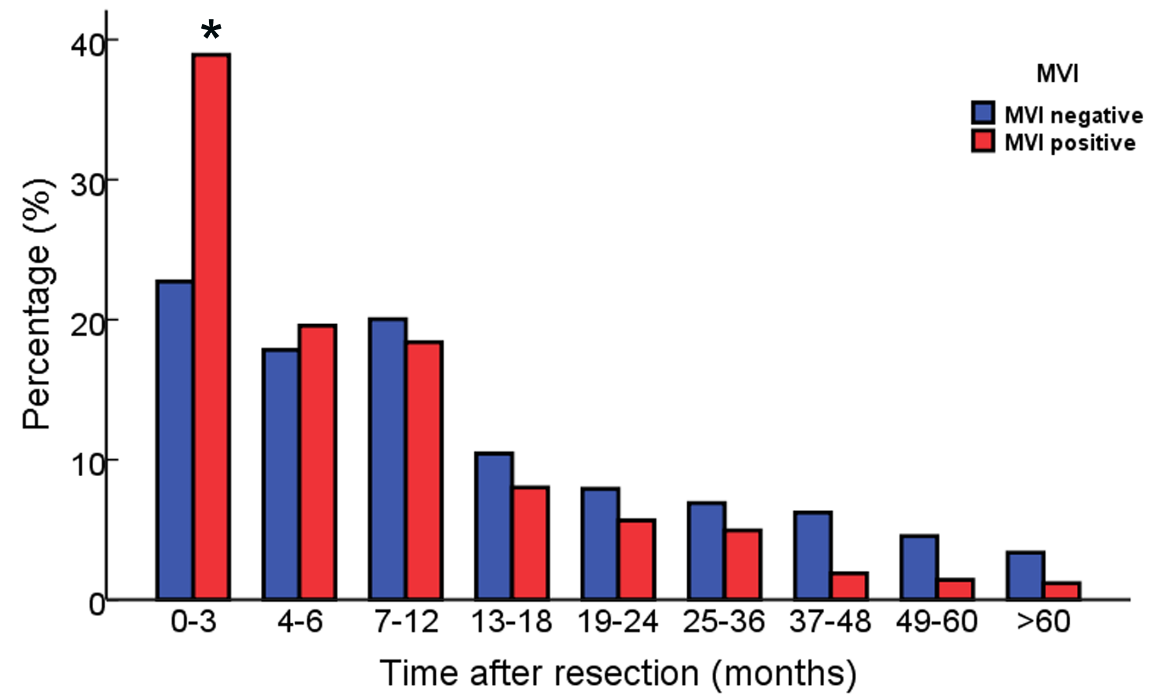


**Supplementary Table 1**. Occurrence rates of extrahepatic organs metastasis

| **Variables** | **Metastasis in the entire cohort** | | | |
| --- | --- | --- | --- | --- |
| **Total No. (n=1756)** | **MVI(+)**  **(n=581)** | **MVI(-)**  **(n=1175)** | ***P***  **value** |
| **Lung** | 149 (8.5) | 83 (14.3) | 66 (5.6) | <0.001 |
| **Lymph node** | 49 (2.8) | 25 (4.3) | 24 (2.0) | 0.007 |
| **Other peritoneus organs†** | 67 (3.8) | 29 (5.0) | 38 (3.2) | 0.070 |
| **Bone** | 6 (0.34) | 2 (0.34) | 4 (0.36) | 0.990 |
| **Brain** | 1 (0.06) | 1 (0.02) | 0 (0) | 0.155 |

Values in parentheses are percentage. †Included adrenal grand, peritoneum, omentum, intestines

**Supplementary Table 2**. Univariate analysis of risk factors associated with early and late recurrence in the entire cohort.

| **Variables** | **Early recurrence**  **HR (95% CI) *P* value** | | **Late recurrence**  **HR (95% CI) *P* value** | |
| --- | --- | --- | --- | --- |
| **Age (year)**, ≤50 *vs.* >50 | 0.773 (0.675-0.884) | <0.001 | 1.345 (0.985-1.834) | 0.062 |
| **Sex**, male *vs.* female | 0.912 (0.742-1.121) | 0.382 | 0.468 (0.266-0.824) | 0.009 |
| **HBsAg**, positive *vs.* negative | 1.243 (1.036-1.492) | 0.019 | 1.743 (1.161-2.618) | 0.007 |
| **Cirrhosis**, yes *vs*. no | 1.139 (0.995-1.303) | 0.059 | 2.473 (1.835-3.334) | <0.001 |
| **ALBI grade**, 2,3 *vs*. 1 | 1.272 (1.116-1.450) | <0.001 | 1.853 (1.375-2.497) | <0.001 |
| **ALT (U/L)**, >40 *vs.* ≤40 | 1.125 (0.983-1.288) | 0.087 | 1.367 (1.009-1.852) | 0.044 |
| **NLR**, >1.9 *vs.* ≤1.9* | 1.525 (1.332-1.747) | <0.001 | 1.008 (0.743-1.368) | 0.958 |
| **AFP (μg/L)**, >400 *vs.* ≤400 | 1.817 (1.588-2.080) | <0.001 | 0.436 (0.295-0.645) | <0.001 |
| **Tumor size (cm)**, >5 *vs*. ≤5 | 1.658 (1.421-1.936) | <0.001 | 0.440 (0.325-0.605) | 0.001 |
| **Tumor number**, multiple *vs.* solitary | 1.480 (1.338-1.636) | <0.001 | 0.845 (0.610-1.169) | 0.309 |
| **Tumor capsule**, incomplete *vs*. complete | 1.047 (0.903-1.231) | 0.546 | 0.571 (0.402-0.811) | 0.021 |
| **Differentiation**, Ⅲ-Ⅳ *vs*. Ⅰ-Ⅱ | 1.379 (1.246-1.526) | <0.001 | 1.710 (1.341-2.182) | <0.001 |
| **MVI**, positive *vs. negative* | 2.068 (1.806-2.369) | <0.001 | 1.366 (0.957-1.951) | 0.086 |
| **Blood transfusion**, yes *vs*. no | 1.595 (1.366-1.861) | <0.001 | 0.887 (0.571-1.378) | 0.595 |
| **Type of resection**, NAR *vs.* AR | 0.856 (0.746-0.982) | 0.027 | 1.037 (0.745-1.445) | 0.829 |
| **Resection margin**, ≤1cm *vs*. >1cm | 0.761 (0.655-0.884) | <0.001 | 1.189 (0.870-1.625) | 0.277 |

HR, hazard ratio; CI, confidence interval; HBsAg, hepatitis B surface antigen; ALT; alanime transaminase; NLR, neutrophil to lymphocyte ratio; AFP, alpha fetoprotein; MVI, microvascular invasion; NAR, non-anatomical resection; AR, anatomical resection. *1.9 was the median value of NLR.

**Supplementary Table 3**. Univariate analysis of risk factors associated with early and late recurrence in the MVI(+) group

| **Variables** | **Early recurrence**  **HR (95% CI) *P* value** | | **Late recurrence**  **HR (95% CI)  *P* value** | |
| --- | --- | --- | --- | --- |
| **Age (year)**, ≤50 *vs.* >50 | 0.828 (0.678-1.011) | 0.064 | 2.086 (1.071-4.066) | 0.032 |
| **Sex**, male *vs.* female | 1.020 (0.738-1.410) | 0.906 | 0.580 (0.176-1.919) | 0.372 |
| **HBsAg**, positive *vs.* negative | 1.078 (0.828-1.403) | 0.578 | 1.124 (0.532-2.375) | 0.759 |
| **Cirrhosis**, yes *vs*. no | 1.307 (1.051-1.625) | 0.016 | 3.338 (1.733-6.431) | <0.001 |
| **ALBI grade**, 2,3 *vs*. 1 | 1.199 (0.994-1.446) | 0.058 | 1.415 (0.785-2.551) | 0.248 |
| **ALT (U/L)**, >40 *vs.* ≤40 | 1.025 (0.839-1.252) | 0.809 | 1.160 (0.619-2.174) | 0.643 |
| **NLR**, >1.9 *vs.* ≤1.9* | 1.317 (1.075-1.615) | 0.008 | 1.136 (0.610-2.113) | 0.688 |
| **AFP (μg/L)**, >400 *vs.* ≤400 | 1.505 (1.230-1.840) | <0.001 | 0.631 (0.324-1.230) | 0.177 |
| **Tumor size (cm)**, >5 *vs*. ≤5 | 1.658 (1.421-1.936) | <0.001 | 0.310 (0.159-0.606) | 0.001 |
| **Tumor number**, multiple *vs.* solitary | 1.535 (1.077-1.441) | 0.003 | 0.874 (0.477-1.600) | 0.662 |
| **Tumor capsule**, incomplete *vs*. complete | 0.832 (0.676-1.024) | 0.083 | 0.377 (0.200-0.713) | 0.030 |
| **Differentiation**, Ⅲ-Ⅳ *vs*. Ⅰ-Ⅱ | 1.235 (0.979-1.558) | 0.074 | 2.817 (1.305-6.084) | 0.008 |
| **Blood transfusion**, yes *vs*. no | 1.148 (0.918-1.438) | 0.228 | 0.758 (0.333-1.722) | 0.508 |
| **Type of resection**, NAR *vs.* AR | 0.945 (0.773-1.155) | 0.582 | 0.975 (0.500-1.903) | 0.941 |
| **Resection margin**, ≤1cm *vs*. >1cm | 0.626 (0.498-0.786) | <0.001 | 0.750 (0.584-2.108) | 0.750 |

HR, hazard ratio; CI, confidence interval; HBsAg, hepatitis B surface antigen; ALT; alanime transaminase; NLR, neutrophil to lymphocyte ratio; AFP, alpha fetoprotein; MVI, microvascular invasion; NAR, non-anatomical resection; AR, anatomical resection. *1.9 was the median value of NLR.

**Supplementary Table 4**. Univariate analysis of risk factors associated with early and late recurrence in the MVI(-) group

| **Variables** | **Early recurrence**  **HR (95% CI) *P* value** | | **Late recurrence**  **HR (95% CI) *P* value** | | |
| --- | --- | --- | --- | --- | --- |
| **Age (year)**, ≤50 *vs.* >50 | 0.778 (0.649-0.933) | 0.007 | 1.176 (0.823-1.679) | 0.373 |
| **Sex**, male *vs.* female | 0.921 (0.705-1.203) | 0.545 | 0.446 (0.234-0.852) | 0.014 |
| **HBsAg**, positive *vs.* negative | 1.362 (1.060-1.751) | 0.016 | 2.097 (1.272-3.456) | 0.004 |
| **Cirrhosis**, yes *vs*. no | 0.917 (0.768-1.096) | 0.342 | 2.387 (1.695-3.361) | <0.001 |
| **ALBI grade**, 2,3 *vs*. 1 | 1.133 (0.942-1.363) | 0.186 | 2.007 (1.412-2.853) | <0.001 |
| **ALT (U/L)**, >40 *vs.* ≤40 | 1.127 (0.939-1.352) | 0.201 | 1.392 (0.979-1.978) | 0.065 |
| **NLR**, >1.9 *vs.* ≤1.9* | 1.562 (1.302-1.873) | <0.001 | 0.958 (0.671-1.368) | 0.815 |
| **AFP (μg/L)**, >400 *vs.* ≤400 | 1.721 (1.429-2.072) | <0.001 | 0.333 (0.199-0.556) | <0.001 |
| **Tumor size (cm)**, >5 *vs*. ≤5 | 1.584 (1.295-1.937) | <0.001 | 0.480 (0.336-0.687) | <0.001 |
| **Tumor number**, multiple *vs.* solitary | 1.643 (1.434-1.883) | <0.001 | 0.809 (0.545-1.201) | 0.239 |
| **Tumor capsule**, incomplete *vs*. complete | 0.984 (0.793-1.220) | 0.881 | 0.579 (0.373-0.897) | 0.015 |
| **Differentiation**, Ⅲ-Ⅳ *vs*. Ⅰ-Ⅱ | 1.196 (0.892-1.603) | 0.232 | 1.151 (0.469-2.824) | 0.759 |
| **Blood transfusion**, yes *vs*. no | 1.804 (1.457-2.234) | <0.001 | 0.916 (0.542-1.548) | 0.742 |
| **Type of resection**, NAR *vs.* AR | 0.923 (0.762-1.118) | 0.412 | 1.078 (0.732-1.588) | 0.704 |
| **Resection margin**, ≤1cm *vs*. >1cm | 0.857 (0.702-1.045) | 0.128 | 1.186 (0.826-1.704) | 0.356 |

HR, hazard ratio; CI, confidence interval; HBsAg, hepatitis B surface antigen; ALT; alanime transaminase; NLR, neutrophil to lymphocyte ratio; AFP, alpha fetoprotein; MVI, microvascular invasion; NAR, non-anatomical resection; AR, anatomical resection. *1.9 was the median.
